1  
2  
3  
4  
5  
6  
7  
8  
9  
10  
11  
12  
13  
14  
15  
16  
17  
18  
19  
20  
21  
22  
23  
24  
25  
26

**Full Title:** Evaluating the Effectiveness of the Mozambique-Canada Maternal Health (MCMH) Project Abstraction Tool in the Identification of Maternal Near-Miss (MNM) Events

**Short Title:** Mozambique-Canada Maternal Health Tool and Maternal Near-Miss

Maud Z Muosieyiri<sup>1,2</sup>, Fernanda Andre<sup>1,3</sup>, Jessie Forsyth<sup>1,3</sup>, Ana Paula Ferrão da Silva Adoni<sup>3,4</sup>, Nazeem Muhajarine<sup>1,3,#</sup>

<sup>1</sup> Department of Community Health and Epidemiology, College of Medicine, University of Saskatchewan, Saskatoon, Saskatchewan, Canada

<sup>2</sup> Current Address: Department of Biostatistics and Epidemiology, University of Massachusetts, Amherst (UMASS Amherst), Amherst, MA, United States of America

<sup>3</sup> Mozambique-Canada Maternal Health Project, Inhambane Province, Mozambique

<sup>4</sup> Provincial Hospital of Inhambane, Mozambique

# Corresponding author  
[nazeem.muhajarine@usask.ca](mailto:nazeem.muhajarine@usask.ca)

## 27 **Abstract**

28 Maternal Near-Miss (MNM) is described as a woman who survives a severe obstetric event.  
29 The World Health Organization (WHO) developed an abstraction tool in 2009 for identifying  
30 MNMs, but it has come under criticism for not being suitable for use in low-resource settings. The  
31 maternal near-miss tool developed by the Mozambique-Canada Maternal Health Project, including  
32 additional clinical criteria, is an adaptation of the WHO version to suit the resource availability in  
33 Mozambique. This study examined whether these additional criteria enhanced maternal near-miss  
34 identification; if so, whether this was observed in particular groups of women.

35 A cross-sectional study was conducted in two hospitals, the Provincial Hospital of Inhambane  
36 province, a tertiary referral care center, and a rural hospital, Vilankulo Rural Hospital, with a large  
37 rural catchment area (approximately 46,543 inhabitants), in the Inhambane province in Mozambique.  
38 Consecutive admissions in the maternity wards in these two hospitals between August 2021 and  
39 February 2022 were eligible and data from 2057 women were included. Chi-square test of  
40 independence, kappa statistics, and multiple logistic regression analyses were performed to address the  
41 study aims.

42 The newer tool with additional clinical criteria identified more maternal near-misses (Expanded  
43 Disease criterion = 28.2%; Comorbidities criterion = 21.1%) than the original WHO tool (16.20%).  
44 Hypertension and Anemia, two criteria in the newer tool, showed strong associations with the original  
45 WHO disease criterion ( $p < 0.001$ ). Hypertension demonstrated a moderate agreement with the WHO  
46 disease criterion ( $\kappa = 0.58$ , 95% CI: 0.53-0.63) while anemia showed a fair agreement ( $\kappa = 0.21$ , 95%  
47 CI: 0.16-0.26). However, HIV/AIDS, the most prevalent comorbidity, was not significantly associated  
48 with the original WHO disease criterion. Furthermore, socio-demographic indicators like distance from

49 home to hospital, age of woman, and type of health facility (provincial or rural district) were significant  
50 predictors of identifying maternal near-misses.

51 In conclusion, incorporating additional criteria enhances – it casts a larger net – the original WHO  
52 disease criterion’s capacity to identify maternal near-misses. Distance from home to the hospital and  
53 age emerge as strong predictors for recognizing MNMs in Inhambane province.

## 54 **Introduction**

55 Maternal mortality remains a pressing global health issue. The United Nations (UN) included  
56 maternal health promotion in the Millenium Development Goals (MDGs), to reduce global  
57 maternal deaths by 75% between 1990 and 2000, as well as in the Sustainable Development Goals  
58 (SDGs), to decrease global maternal deaths to less than 70 per 100,000 births by 2030.[1] Yet,  
59 maternal mortality still occurs in about 151 per 100,000 births predominantly within Africa, Asia,  
60 and Latin America where a combination of clinical and socio-cultural factors significantly increase  
61 the risk of maternal deaths.[2-3]

62 Although maternal mortality is high, it occurs less frequently than maternal near-misses  
63 (MNM). [4] Maternal near-miss refers to an event where a woman nearly died but survived a  
64 complication during pregnancy, childbirth, or within 42 days of termination of pregnancy.[5]  
65 MNMs are seen as efficient alternatives, to otherwise maternal mortality, for evaluating and  
66 improving the quality of maternal care.[6] An important development that has spurred MNM  
67 research and action is the creation of an abstraction tool to help clinicians and researchers identify  
68 MNMs.[7]

69 The WHO’s MNM abstraction tool comprises three main criteria: Disease-based,  
70 Intervention- based, and Organ-dysfunction criteria. The Disease-based criterion includes five

71 “potentially life-threatening” clinical indicators marking the initial stage in the pathological  
72 continuum that eventually leads to death.[7] The Intervention category contains four hospital-  
73 based parameters aiding in predicting and mitigating death risks. Lastly, the Organ-dysfunction  
74 criterion consists of seven “life-threatening” system failure markers representing the final stage of  
75 this pathological continuum directly causing maternal death.[7-8], (Figure S1). According to the  
76 WHO, the organ dysfunction criterion is the most effective at predicting MNMs since it is sensitive  
77 enough to identify severe life-threatening cases and specific enough to exclude “unnecessary”  
78 obstetric events to achieve a manageable workload for clinicians.[7] Evidence from earlier  
79 validation studies supported this theory.[9-10] Thus, researchers consider the criterion as the most  
80 “epidemiologically sound criterion to use in predicting MNM cases”.[5]

81 However, subsequent studies have demonstrated major challenges in relying solely on Organ-  
82 dysfunction in low- and middle-income countries (LMICs) due to a lack of appropriate laboratory  
83 diagnostic equipment and skilled clinicians.[7,10] Most studies further show that the Disease-  
84 based criterion is a better standard for identifying MNMs in resource-limited regions because  
85 pregnant women usually present with a combination of clinical indicators, due to substantial delays  
86 in obtaining obstetric care, that significantly increase their risk of MNMs.[3,9,11] Overwhelming  
87 evidence shows hemorrhage, anemia, and hypertension are the leading causes of MNMs in low-  
88 income settings.[10-13] For these reasons, revisions have been made to the WHO abstraction tool  
89 to improve its utility in resource-limited settings.

90 The adapted sub-Saharan Africa MNM Abstraction (SSA) tool is one of the well-known  
91 adaptations of the WHO abstraction tool and forms the foundation for other country-specific  
92 versions of the SSA, like the Nigerian abstraction tool.[11] The tool developed by Mozambique-  
93 Canada Maternal Health Project (MCMH project) is a further iteration of the Nigerian version

94 (Figure S2). The MCMH abstraction tool maintains all the indicators of both the Intervention and  
95 Organ dysfunction criteria; the latter includes cardiac, respiratory, renal,  
96 coagulation/hematological, hepatic, neurologic, and uterine dysfunctions. However, it  
97 substantially expands the disease-based markers, by introducing the “Expanded Disease” and  
98 “Comorbidities” criteria. The Expanded disease criterion elaborates on each marker from the  
99 original WHO disease category while the comorbidities criterion includes non-obstetric  
100 comorbidities such as HIV/AIDS and malaria. Additionally, it uniquely incorporates specific  
101 socio-demographics known to impact maternal morbidity and mortality.[14-25] Thus, the MCMH  
102 abstraction tool, constructed by the Mozambique-Canada Maternal Health working group, aims to  
103 capture more comprehensive clinical and socio-demographic information. It was utilized in the  
104 MNM 1.0 cross-sectional study in two hospitals in the Inhambane province, Mozambique.

105 Although the adapted sub-Saharan Africa MNM tools (the MCMH abstraction tool is an  
106 example) have been used to collect data, no research has been conducted to investigate how the  
107 adapted tool enhances MNM identification. This study addressed this gap by analyzing how the  
108 MCMH’s additional clinical criteria may improve the capacity of the original WHO disease  
109 criterion in identifying MNM cases. It also examined the impact of specific health systems,  
110 geographic, and socio-demographic factors like the type of hospital, distance to the health facility,  
111 age of woman, education, profession, marital status, and religion, on MNM identification.

## 112 **Materials and Methods**

### 113 **Study Setting, Design, and Population**

114 Eligible participants were women who presented consecutively at two hospitals, Vilankulo  
115 Rural Hospital, a rural referral hospital with a large rural catchment area of approximately 46,543  
116 inhabitants, and Inhambane Provincial Hospital, the central tertiary hospital in the Inhambane

117 province, from August 16, 2021, to February 18, 2022, during pregnancy, labor, delivery, or up to  
118 42 days post-partum or termination of pregnancy (including abortion and ectopic pregnancy). A  
119 total of 2057 medical records were retrieved, with 1255 participants from Vilankulo Rural Hospital  
120 and 802 from Inhambane Provincial Hospital (HPI).

121 Inhambane province is located on the southern coast of Mozambique with a population of  
122 about 1.4 million.[26] Both hospitals are secondary referral facilities, but HPI is a referral center  
123 for the entire province, including Vilankulo and other secondary hospitals. Participants were  
124 recruited by well-trained health personnel who approached women in the maternity units in both  
125 hospitals. Interested women gave consent to access their records and to participate in the study.  
126 The trained personnel also collected data through participant interviews and medical records, using  
127 the MCMH abstraction tool. Weekly meetings were held to ensure data quality.

## 128 **Ethical Consideration**

129 Application for ethical approval for this secondary use of the MNM 1.0 was sought from the  
130 University of Saskatchewan Research Ethics Board. Approval was obtained on December 05, 2022  
131 (Approval number: Bio 3774 NER). To ensure the confidentiality of patient information, only de-  
132 identified patient information was used. Original approval for the MNM 1.0 study was obtained  
133 from the National Committee on Bioethics in Health, Mozambique on May 20, 2019 (Approval  
134 number: 234/CNBS/19). Formal written consent was obtained from all participants in the study.  
135 For participants younger than 18 years, written assents were obtained from the children while  
136 written informed consent was obtained from their parents/guardians.

## 137 **Data Collection Tool**

138 The MCMH abstraction tool collected the clinical and socio-demographic information of  
139 participants. The information was divided into the following sections respectively: a)  
140 hospitalization information b) socio-demographic data c) vitals and pregnancy history d) organ-  
141 dysfunction markers e) intervention indicators f) disease-based markers g) expanded disease  
142 markers h) comorbidities indicators i) fetal or neonatal outcome in women with delivery (Figure  
143 S2).

144 A maternal near-miss case could fulfill definitions from any or all five criteria (sections [d]  
145 through [h]). Thus, fulfillment of each criterion was counted as an MNM identified by that  
146 criterion. For example, an HIV-positive woman with severe bleeding and neurological issues  
147 admitted to the intensive care unit (ICU) met Disease-based [f], Intervention [e], Organ  
148 dysfunction [d], and Comorbidities [h] criteria. Biomedical data in sections [d] through [h] were  
149 abstracted exclusively from medical records. Four data collectors and a supervisor, based at each  
150 hospital, received training before data collection for each research site. Data quality was ensured  
151 through frequent checks for uniformity, completeness, and accuracy. Following data collection,  
152 two additional personnel further cleaned the dataset before analysis.

## 153 **Data Analysis**

154 Chi-square tests of independence were conducted to examine the relationship between each  
155 additional clinical criterion and the original WHO disease criterion. Kappa statistics were utilized  
156 to assess the agreement between indicators of the expanded clinical criteria and the original  
157 Disease criteria. Agreement levels were interpreted based on predefined thresholds.[27] To explore  
158 hospital-specific differences, the data was stratified, and both chi-square tests of independence and  
159 kappa statistics were re-run on health facility-specific data.

160 To determine the association between specific socio-demographic factors and MNM outcome,  
161 multivariable logistic regressions were performed. Initially, bivariate analyses were conducted to  
162 assess the relationship between each independent variable and the outcome. Significant variables  
163 ( $p < 0.05$ ) were included in multivariate analyses. Interaction terms were tested using the 2-log-  
164 likelihood method, and confounding effects were evaluated. Goodness-of-fit was assessed using  
165 the Hosmer-Lemeshow estimates, with a chi-square value and  $p > 0.05$  indicating a good model fit.  
166 Odds ratios, 95% confidence intervals, and p-values were reported for each model. Facility-based  
167 models were obtained through data stratification and following the same steps. Only statistically  
168 significant models per hospital were reported.

169

170

171

## 172 **Results**

### 173 **Study Population Characteristics**

174 Distributions of the population characteristics are presented in Table 1. Approximately half  
175 (49.8%) of the women were 24 years or younger and nearly one-third of all study participants were  
176 either married or lived maritally with their partners. Most women (68%) stayed close to the study  
177 health facilities, within 8 kilometers. Less than half of the population (39%) completed secondary  
178 school education and even less than one-tenth completed a bachelors or graduate degree. The  
179 majority of these women were unemployed (86.7%) and practiced Christianity (93.7%) (Table 1).

180 **Table 1. Characteristics of Study Participants, Maternal Near-miss Study, Inhambane**  
181 **Province, Mozambique, (n=2057)**

| Variable                          | Frequency (%) |
|-----------------------------------|---------------|
| <b>Hospital admitted (n=2055)</b> |               |



|                                             |             |
|---------------------------------------------|-------------|
| Inhambane Provincial Hospital               | 800 (38.9)  |
| Vilankulo Rural Hospital                    | 1255 (61.1) |
| <b>Distance to Health Facility (n=2054)</b> |             |
| Within 8km to hospital                      | 1397 (68.0) |
| More than 8km                               | 657 (32.0)  |
| <b>Educational Level (n=2051)</b>           |             |
| None                                        | 246 (12.0)  |
| Primary School 1                            | 255 (12.4)  |
| Primary School 2                            | 545 (26.6)  |
| Secondary School                            | 633 (30.9)  |
| Post Secondary                              | 285 (13.9)  |
| Bachelors                                   | 77 (3.7)    |
| Graduate                                    | 10 (0.5)    |
| <b>Profession (n=2053)</b>                  |             |
| Unemployed                                  | 1735 (86.7) |
| Unqualified Employment                      | 161 (8.2)   |
| Semi-qualified Employment                   | 92 (4.6)    |
| Professional                                | 11 (0.5)    |
| <b>Religion (n=2045)</b>                    |             |
| Islam                                       | 60 (3.1)    |
| Christianity                                | 1867 (93.7) |
| Traditional                                 | 63 (3.1)    |
| Other                                       | 2 (0.1)     |
| <b>Marital Status (n=2052)</b>              |             |
| Single                                      | 518 (25.9)  |
| Married                                     | 96 (5.0)    |
| Live Maritally                              | 1374 (68.6) |
| Divorced                                    | 9 (0.4)     |
| Widow                                       | 2 (0.1)     |
| <b>Age Categories (n=2057)</b>              |             |
| ≤19                                         | 437 (21.8)  |
| 20-24                                       | 558 (27.8)  |
| 25-29                                       | 433 (21.6)  |
| 30-34                                       | 354 (17.9)  |
| 35-39                                       | 165 (8.2)   |
| ≥40                                         | 55 (2.7)    |

## 183 **Maternal Near-Misses Identified by Different Criteria**

184 Table 2 and Figure 1 show the distributions of MNMs identified by each criterion. The  
 185 Expanded disease (28.2%) and Comorbidities criteria (21.1%) identified the highest MNM cases  
 186 while the Organ-dysfunction criterion yielded the least (2.7%). Each criterion comprises prominent  
 187 markers that helped identify MNMs for that category (Table 3). Hypertension contributed to the  
 188 most cases in the original WHO Disease criterion (66.6%) while Infection represented the least  
 189 (1.5%). Blood transfusion contributed to the most events under the Intervention criterion (71.3%),  
 190 no patient underwent interventional radiology. Neurological dysfunction accounted for the most  
 191 cases under the Organ-dysfunction criterion (58.2%), while liver dysfunction showed the least  
 192 contribution (1.8%). Hypertension remained the highest contributor to the Expanded Disease  
 193 criterion (36.6%) while infection remained the least (1.6%). MNMs under the Comorbidities  
 194 criterion were mainly attributed to HIV/AIDS (42.9%), anemia (6.5%), and malaria (1.9%).  
 195 Medical conditions like kidney, heart, liver, and lung diseases, as well as cancer, were not  
 196 identified in any study participants.

197 **Table 2. Frequency Distributions of Maternal Near-miss as Identified by Different Criteria,**  
 198 **the WHO and Mozambique-Canada Maternal Health Project Abstraction tools (n=2057)**

| Criteria                                                                        | Frequency (%) |
|---------------------------------------------------------------------------------|---------------|
| WHO Disease grouping (n = 2054)                                                 | 332 (16.2)    |
| WHO Interventions grouping (n = 2057)                                           | 87 (4.2)      |
| WHO Organ-dysfunction grouping (n = 2055)                                       | 55 (2.7)      |
| Mozambique-Canada Maternal Health Tool,<br>Expanded Disease grouping (n = 2057) | 580 (28.2)    |
| Mozambique-Canada Maternal Health Tool,<br>Comorbidities grouping (n = 2056)    | 434 (21.1)    |

199

200 [Insert: Figure 1. MNMs Identified by the Different Criteria (Fig A – E) of the MCMH  
 201 Abstraction Tool]  
 202

203 Table 3. Each Sub-Category Contribution to Maternal Near-miss Identification (n=2057)

| Category                                          | Sub-category                  | Frequency (%) |
|---------------------------------------------------|-------------------------------|---------------|
| <b>A: WHO, Disease grouping (n=332)</b>           | Severe Bleeding               | 11 (3.3)      |
|                                                   | Hypertensive Disorder         | 221 (66.6)    |
|                                                   | Dystocia                      | 69 (20.8)     |
|                                                   | Infection                     | 5 (1.5)       |
|                                                   | Anemia                        | 55 (16.6)     |
| <b>B: WHO, Intervention grouping (n=87)</b>       | Admission to ICU              | 34 (40.0)     |
|                                                   | Interventional Radiology      | 0 (0)         |
|                                                   | Emergency Laparotomy          | 16 (18.6)     |
|                                                   | Transfusion of Blood Products | 62 (71.3)     |
|                                                   |                               |               |
| <b>C: WHO, Organ-Dysfunction grouping (n=55)</b>  | Cardiac Dysfunction           | 13 (23.6)     |
|                                                   | Respiratory Dysfunction       | 8 (14.5)      |
|                                                   | Renal Dysfunction             | 2 (3.7)       |
|                                                   | Hematological Dysfunction     | 10 (18.2)     |
|                                                   | Liver Dysfunction             | 1 (1.8)       |
|                                                   | Neurological Dysfunction      | 32 (58.2)     |
|                                                   |                               |               |
| <b>D: MCMH, Expanded Disease grouping (n=580)</b> | Bleeding                      | 69 (7.8)      |
|                                                   | Hypertensive Disorder         | 322 (36.6)    |
|                                                   | Obstructed Labor              | 201 (22.8)    |
|                                                   | Infection                     | 14 (1.6)      |
| <b>E: MCMH, Comorbidities grouping</b>            | HIV/AIDS                      | 377 (42.9)    |
|                                                   | Malaria                       | 17 (1.9)      |
|                                                   | Embolic Disease               | 2 (0.2)       |

|                        |          |
|------------------------|----------|
| Anemia                 | 57 (6.5) |
| Concomitant Conditions | 2 (0.2)  |

204 MCMH = Mozambique-Canada Maternal Health project abstraction tool

205

206 Data from Table 3 was stratified by hospitals (S3 Table). Hypertension, admission to ICU,  
207 neurological dysfunction, and HIV/AIDS remained the predominant markers of MNMs in both  
208 sites. Notably, MNMs associated with hypertensive disorder (16.2% for WHO Disease, and 20.6%  
209 for Expanded Disease) and with ICU admission (2.9%) remained highest among patients in the  
210 provincial hospital, while neurological dysfunction (2.1%) and HIV/AIDs (24.2%) were identified  
211 as the most prominent cause associated with MNMs in Vilankulo Rural District Hospital.

212

213

214

215

### 216 **Indicators of the Expanded Clinical Criteria that are Associated with the WHO** 217 **Disease-Criterion**

218

219 As presented in Table 4, all variables in the Expanded Disease-criterion were statistically  
220 associated with the original WHO Disease-criterion ( $p < 0.001$ ). Within this category, hypertension  
221 had the strongest association with the original disease category ( $\chi^2 = 678.5$ , [d.f. = 1,  $p < 0.001$ ])  
222 while obstructed labor had the weakest association with the original WHO Disease criterion ( $\chi^2$   
223 = 24.0, [d.f. = 1,  $p < 0.001$ ]). Variables in the Comorbidities category were also statistically related  
224 to the original WHO Disease criterion ( $p < 0.05$ ) with the exception of HIV/AIDS ( $p > 0.05$ ).  
225 Among the statistically significant, anemia was most strongly associated with the original WHO  
226 Disease-criterion ( $\chi^2 = 200.1$ , [d.f. = 1,  $p < 0.001$ ]) while malaria had the weakest association  
227 with this original WHO Disease category ( $\chi^2 = 4.6$ , [d.f. = 1,  $p < 0.005$ ]).

228

229

230

231

232

233

234

235

236

237

238

239

240

241 **Table 4. Overall Results from Chi-Square Test of Independence and kappa Statistic Between the WHO Disease Criterion vs the**  
 242 **Mozambique-Canada Maternal Health Expanded Disease and Comorbidities Criteria**

| Association Variable                                                | Chi-square<br>( $\chi^2$ ) | d.f. | P-value                  | kappa Value   | Confidence Interval |       |
|---------------------------------------------------------------------|----------------------------|------|--------------------------|---------------|---------------------|-------|
|                                                                     |                            |      |                          |               | Lower               | Upper |
| <b>MCMH Expanded Disease Indicators with WHO Disease Criterion:</b> |                            |      |                          |               |                     |       |
| Bleeding and Original Disease Criterion                             | 46.7                       | 1    | <0.001                   | 0.11          | 0.06                | 0.16  |
| Infection and Original Disease Criterion                            | 35.6                       | 1    | <0.001                   | 0.05          | 0.02                | 0.08  |
| Hypertension and Original Disease Criterion                         | 678.5                      | 1    | <0.001                   | <b>0.58**</b> | 0.53                | 0.62  |
| Obstructed Labor and Original Disease Criterion                     | 24.0                       | 1    | <0.001                   | 0.10          | 0.06                | 0.15  |
| <b>MCMH Comorbidities Grouping with WHO Disease Grouping:</b>       |                            |      |                          |               |                     |       |
| HIV/AIDS and Original Disease Criterion                             | 0.7                        | 1    | <b>0.409<sup>b</sup></b> | 0.02          | -0.027              | 0.06  |
| Malaria and Original Disease Criterion                              | 4.7                        | 1    | 0.032                    | 0.02          | -0.00               | 0.04  |
| Anemia and Original Disease Criterion                               | 200.1                      | 1    | <0.001                   | <b>0.21**</b> | 0.16                | 0.26  |
| Embolic Disease and Original Disease Criterion                      | 10.4                       | 1    | 0.001                    | 0.01          | -0.00               | 0.02  |

243

244 \*\*kappa values greater than 0.2 fair or higher reliability

245 <sup>b</sup> p-value greater than 0.05 suggesting a lack of association between variables

246 MCMH = Mozambique-Canada Maternal Health, Maternal Near-miss Abstraction Tool

247 The kappa estimates, which evaluates the corroboration between the original WHO Disease  
248 criteria and MCMH Expanded Disease indicators, revealed an overall ‘weak’ agreement between  
249 the two categories (Table 4). Only hypertension, one specific condition within MCMH Expanded  
250 Disease, showed a 'moderate' degree of agreement with the original WHO Disease criterion ( $\kappa =$   
251  $0.58$ , 95% CI:  $[0.53, 0.63]$ ). Generally, the kappa estimates for the MCMH Comorbidities group  
252 and WHO Disease criterion were lower than those for the MCMH Expanded Disease criterion and  
253 WHO Disease criterion. Most comorbidities showed no agreement with the original WHO Disease  
254 criterion, with embolic disease having the lowest level of agreement ( $\kappa = 0.01$ , 95% CI:  $[0.00,$   
255  $0.02]$ ). Anemia was the only factor to have a ‘fair’ agreement with the original WHO Disease  
256 criterion ( $\kappa = 0.21$ , 95% CI:  $[0.16, 0.26]$ ).

257 Similar tests were conducted on hospital-stratified data to identify hospital-specific  
258 characteristics. In provincial hospital specific data, hypertension remained strongly associated ( $\chi^2$   
259  $= 336.7$ , [d.f. = 1,  $p < 0.001$ ]) and showed an improved agreement, from 'moderate' to 'substantial',  
260 with the original WHO Disease criterion ( $\kappa = 0.65$ , 95% CI:  $[0.58, 0.72]$ ). For the comorbidity  
261 variables, HIV/AIDS continued to lack an association with the original WHO Disease group ( $p >$   
262  $0.05$ ) (S4 Table). In Vilankulo Rural Hospital data, hypertension retained the strongest association  
263 with the original WHO Disease category ( $\chi^2 = 317.1$ , [d.f. = 1,  $p < 0.001$ ]). Hypertension had a  
264 ‘moderate’ agreement with the original WHO Disease category ( $\kappa = 0.50$ , 95% CI:  $[0.43-0.57]$ )  
265 and HIV/AIDS still showed no association with the WHO Disease group ( $p > 0.05$ ) (S5 Table).

266  
267  
268  
269  
270



271 **Socio-demographic Factors that are Associated with Identifying MNMs**  
272 **Defined by Each Clinical Criterion**

273  
274 Table 5 displays results of the multivariable analysis on the relationship between socio-  
275 demographic factors and WHO abstraction tool defined MNMs. The first multivariable analysis  
276 examined the relationship between socio-demographic factors and the original WHO Disease-  
277 criterion defined MNMs. The Hosmer-Lemeshow test indicates a good fit ( $\chi^2 = 4.8$  [d.f. = 8,  $p =$   
278  $0.780 > 0.05$ ]) with the model successfully predicting observed data points (84%). None of the  
279 interaction terms tested were statistically significant and no confounding effects were observed.  
280 Only distance to the health facility was statistically significant in this model (Figure 2), indicating  
281 that individuals living over 8km from the study hospitals had over twice the odds of being  
282 identified MNMs compared to those within 8km (OR = 2.47, 95% CI: [1.92,3.18]).

283  
284  
285  
286  
287  
288  
289  
290  
291  
292  
293  
294  
295

296 **Table 5. Multivariable Analysis on the Association Between Maternal Characteristics and WHO Disease Criterion for**  
 297 **Identifying MNMs**

| <b>Variables</b>                   | <b>Adjusted OR</b> | <b>P-Value</b>   |
|------------------------------------|--------------------|------------------|
| <b>Hospital admitted</b>           |                    |                  |
| Inhambane Provincial Hospital      | 1 [Ref]            |                  |
| Vilankulo Rural Hospital           | 0.84 [0.65-1.09]   | 0.186            |
| <b>Distance to Health Facility</b> |                    |                  |
| Within 8 km                        | 1 [Ref]            |                  |
| More than 8 km                     | 2.47 [1.92-3.18]   | <b>&lt;0.001</b> |
| <b>Educational Level</b>           |                    |                  |
| None                               | 1 [Ref]            |                  |
| Primary School                     | 0.88 [0.59-1.33]   | 0.554            |
| Secondary School or Post-Secondary | 1.09 [0.72-1.65]   | 0.684            |
| Bachelors or Graduate              | 1.89 [1.02- 3.52]  | <b>0.043</b>     |
| <b>Age Categories</b>              |                    |                  |
| ≤ 19                               | 1 [Ref]            |                  |

|                           |                  |       |
|---------------------------|------------------|-------|
| 20-29                     | 0.90 [0.66-1.23] | 0.511 |
| 30-39                     | 1.11 [0.77-1.59] | 0.589 |
| ≥ 40                      | 1.50 [0.73-3.09] | 0.272 |
| <b>Marital Status</b>     |                  |       |
| Single                    | 1 [Ref]          |       |
| Married or Live Maritally | 1.20 [0.89-1.61] | 0.229 |
| Divorced or Widowed       | 0.47 [0.06-3.78] | 0.474 |

298

299 All boldened p-values indicate statistically significant values (p-value < 0.05)

300 Hosmer-Lemeshow Goodness of fit: ( $\chi^2 = 4.790$  [d.f. = 8, p-value = 0.780 > 0.05])

301 The second multivariable analysis explored the association between socio-demographic  
302 predictors and MCMH Expanded Disease-defined MNMs (Table 6). Hosmer-Lemeshow test  
303 showed that the final multivariable model is well-fitted ( $\chi^2 = 4.9$  [d.f. = 7,  $p = 0.668 > 0.05$ ]) and  
304 has a 71.9% accurate prediction of the observed events. No interaction was determined through  
305 statistical testing nor was confounding effects observed. Distance from the health facility remained  
306 highly associated with MNM identification, with individuals living over 8km to the hospital having  
307 over twice the odds compared to those within 8km (OR = 2.26, 95%CI:1[.83-2.78]). Additionally,  
308 the type of hospital was a significant factor, with 29% lower likelihood of identifying an MNM  
309 case among the rural hospital cases compared to provincial hospital cases (OR = 0.70, 95%CI:  
310 [0.57-0.87]) (Table 6, Figure 2).

311

312

313

314

315

316

317

318

319

320

321

322

323

324 **Table 6. Multivariable Analysis on the Association Between Maternal Characteristics and the Mozambique-Canada Maternal**  
 325 **Health Project Expanded Disease Criterion MNMs**

| <b>Variables</b>                   | <b>Adjusted OR</b> | <b>P-Value</b>   |
|------------------------------------|--------------------|------------------|
| <b>Hospital admitted</b>           |                    |                  |
| Inhambane Provincial Hospital      | 1 [Ref]            |                  |
| Vilankulo District Hospital        | 0.70 [0.57-0.87]   | <b>0.001</b>     |
| <b>Place of Residence</b>          |                    |                  |
| Within 8 km                        | 1 [Ref]            |                  |
| More than 8 km                     | 2.26 [1.83-2.78]   | <b>&lt;0.001</b> |
| <b>Educational Level</b>           |                    |                  |
| None                               | 1 [Ref]            |                  |
| Primary School                     | 1.00 [0.71-1.37]   | 0.946            |
| Secondary School or Post-Secondary | 1.19 [0.87-1.64]   | 0.283            |
| Bachelors or Graduate              | 1.47 [0.85- 2.52]  | 0.167            |

326  
 327 All boldened p-values indicate statistically significant values (p-value < 0.05)  
 328 Hosmer-Lemeshow Goodness of fit: ( $\chi^2 = 4.937$  [d.f. = 7, p-value = 0.668 > 0.05])

329 Table 7 shows the results from the third logistic regression model between socio-  
330 demographic factors and MCMH Comorbidities-defined MNMs. Results from the Hosmer-  
331 Lemeshow test demonstrated that the final multivariable model is well-fitted ( $\chi^2 = 5.8$  [d.f. = 8,  
332  $p = 0.674 > 0.05$ ]) with a 79.7% accurate prediction of observed events. No interactions between  
333 covariates were observed. However, both maternal educational level and type of hospital produced  
334 confounding effects ( $|\text{Adjusted} - \text{Crude ORs}| > 10\%$ ). In the adjusted model, individuals living  
335 over 8km were about 57% more likely to be identified as MNMs than those within that distance  
336 (OR = 1.58, 95%CI: [1.24,2.01]). Unlike previous MNM groups (WHO Disease-Criterion defined  
337 and MCMH Expanded Disease defined MNMs), admission to the rural hospital, rather than the  
338 provincial hospital, increased the odds of identifying comorbidities-defined MNMs (OR = 3.13,  
339 95%CI: [2.40-4.10]) (Table 7, Figure 2).

340

341

342

343

344

345

346

347

348

349

350

351

352 **Table 7. Multivariable Analysis on the Association Between Maternal Characteristics and the Mozambique-Canada Maternal**  
 353 **Health Project Comorbidities Criterion MNMs**

| <b>Variables</b>                   | <b>Adjusted OR</b> | <b>P-Value</b>   |
|------------------------------------|--------------------|------------------|
| <b>Hospital admitted</b>           |                    |                  |
| Inhambane Provincial Hospital      | 1 [Ref]            |                  |
| Vilankulo Rural Hospital           | 3.13 [2.40-4.08]   | <b>&lt;0.001</b> |
| <b>Distance to Health Facility</b> |                    |                  |
| Within 8 km                        | 1 [Ref]            |                  |
| More than 8 km                     | 1.58 [1.24-2.01]   | <b>&lt;0.001</b> |
| <b>Educational Level</b>           |                    |                  |
| None                               | 1 [Ref]            |                  |
| Primary School                     | 0.70 [0.49-0.98]   | <b>0.040</b>     |
| Secondary School or Post-Secondary | 0.67 [0.47-0.96]   | <b>0.028</b>     |
| Bachelors or Graduate              | 0.45 [0.22- 0.91]  | <b>0.027</b>     |
| <b>Age Categories</b>              |                    |                  |
| ≤ 19                               | 1 [Ref]            |                  |
| 20-29                              | 1.73 [1.25-2.40]   | <b>&lt;0.001</b> |

|       |                  |                  |
|-------|------------------|------------------|
| 30-39 | 3.06 [2.15-4.36] | <b>&lt;0.001</b> |
| ≥ 40  | 4.73 [2.43-9.20] | <b>&lt;0.001</b> |

354

355 All boldened p-values indicate statistical significance of variable (p-value <0.05)

356 Hosmer-Lemeshow Goodness of fit: ( $\chi^2 = 5.757$  [d.f. = 8, p-value = 0.674 > 0.05])

357

358 **(Insert: Figure 2. Odd Ratios of Sociodemographic Factors on MNMs Defined by The WHO Disease (A), Expanded Disease**  
359 **(B), and Comorbidities Criteria (C))**



## 360 **Discussion**

361 This study assessed if the additional clinical criteria, Expanded Disease and Comorbidities, as  
362 measured by the MNM abstraction tool developed by Mozambique-Canada Maternal Health  
363 Project improved the capacity of the original WHO Disease criterion in identifying potential  
364 MNMs. It also examined what socio-demographic factors influenced the identification of MNMs  
365 in Inhambane, Mozambique.

366 It is well argued that MNM cases represent the severe end of obstetrical complications; it has  
367 been reported that for every maternal death, there may be up to 12 maternal near-miss cases.[29]  
368 Therefore, broadly identifying potential MNM cases, especially in low-resource settings, has value  
369 clinically. This enables health care providers to be vigilant and to work towards preventing severe  
370 obstetrical risks, ideally, or, failing that, to care for those with risk for severe obstetric outcomes  
371 and arrest the progression to mortality.

372 The study findings revealed that the expanded disease criteria identified more MNMs than the  
373 original WHO Disease category, with hypertensive disorders being the main contributor to this  
374 enhanced identification of MNMs. Both the Expanded Disease and original WHO Disease  
375 categories target similar populations, with the former identifying more MNMs. There was less  
376 overlap between Comorbidities indicators and the original WHO Disease criterion, except for  
377 anemia. The Organ dysfunction criterion was the most conservative for identifying MNMs in the  
378 current study. These results are generally consistent with previous literature.[12, 30-31] A clinical  
379 implication of these findings is that women who present with chronic hypertensive disorders or  
380 anemia are at further risk for severe obstetric outcomes and will need rapid and targeted care to  
381 avoid negative outcomes including death.

382 Similar to the study findings, the sub-Saharan Africa MNM abstraction literature  
383 demonstrates that hypertensive disorders is one of the biggest clinical markers of MNMs. Research  
384 shows that hypertensive disorders account for about 20% to 53% of all MNM cases in SSA.[32-  
385 35] Other studies also include dystocia and anemia as top causes of maternal morbidity.[4,12, 36-  
386 38] Although hemorrhage is also reported as a prominent marker for MNMs in SSA, this was not  
387 established in our study. Most studies report post-partum hemorrhage as the highest cause of  
388 MNMs in SSA ranging from 20% to 57% of all cases.[12-13, 33-35,39-44] However, in the current  
389 study, hemorrhage contributed only to 3.3% of all cases, may be partly explained by an effective  
390 hospital management protocol for hemorrhage in the hospitals participating in this study, such as  
391 the rapid intervention on transfusion of blood or its products.[43] This management protocol is  
392 further evidenced by the fact that about 72% of all MNMs identified by the Intervention criterion  
393 received a blood transfusion. Alternatively, the low hemorrhage cases could be attributed to a  
394 renewed focus on continuous clinical training on managing obstetric hemorrhage, in part, as a  
395 result of the training provided by the MCMH project within the Inhambane province.

396 Although HIV/AIDS was prevalent, it consistently lacked an association with the original  
397 WHO Disease category in both hospitals. Other Comorbidity markers, like malaria and embolic  
398 disease (thrombo/amniotic/air embolism), showed weak associations with the original WHO Disease  
399 group as well. Researchers assert that Comorbid or pre-existing non-obstetric indicators only  
400 account for a small subset of all MNMs. For instance, a study showed that only 2.5% of cases were  
401 associated with HIV/AIDS and 4.1% with malaria.[44] Oladapo and colleagues [32] noted that  
402 these Comorbid diseases contributed only marginally to the overall MNM cases in their study.  
403 However, they also observed that these diseases disproportionately contributed more to maternal  
404 deaths. Thus, in their study, while only 6.8% of all MNMs were attributed to Comorbid disease,

405 about 19.6% of maternal deaths were associated with these underlying non-obstetric markers.[32]  
406 Overall, the results indicate that the Comorbidities criterion, except anemia, does not help improve  
407 the capacity of the original WHO Disease criterion in identifying MNMs in both hospitals.

408 To further understand the profile of a potential MNM, it is necessary to understand the  
409 structural factors underpinning the condition. Distance from the hospital was consistently  
410 associated with MNMs, regardless of the clinical definition. Thaddeus and Maine stipulated, in  
411 their three-delay framework, that distance from a health facility was an essential determinant of  
412 the second type of delay that increases the risk of MNM and/or death.[45] In many rural areas  
413 within sub-Saharan Africa, the paucity of public transportation, high transport costs, and/or poor  
414 road infrastructure exacerbate the delays in reaching these facilities during an obstetric  
415 complication.[30,37,46-47] The unavailability of suitable transportation consequently forces some  
416 women to walk the distance during an obstetric complication.[46-48] A study showed that walking  
417 for more than 1 hour to a health facility was associated with about 4 times higher odds of  
418 MNMs.[47] Another study revealed that delays caused by the lack of vehicles increased the odds  
419 of MNMs by 8 times.[49] Furthermore, Hadush observed that delays in reaching a health facility  
420 contributed to about 40% of the maternal morbidities in their study.[50] Our results reveal similar  
421 trends; it suggests that significant delays potentially occur for women who live greater than 8km  
422 from a health facility due to transport-related issues which subsequently increases their odds of  
423 MNMs.

424 The type of hospital, essentially a provincial hospital drawing referrals from the entire  
425 province or a district hospital with a large rural catchment area, was also significantly associated  
426 with the identification of MNMs by utilizing the additional clinical categories. As compared to the  
427 provincial hospital, it was less likely for women to be identified as MNMs in the district hospital

428 when using the Expanded Disease criterion. One potential reason is that, as a provincial referral  
429 hospital, the Inhambane Provincial Hospital receives women in more critical clinical conditions  
430 than those seen at the Vilankulo Rural Hospital. Conversely, the odds of identifying MNMs using  
431 the Comorbidities criterion were higher in the rural hospital than in the provincial hospital because  
432 the Vilankulo Rural Hospital receives more pregnant women with non-pregnancy related comorbid  
433 conditions, such as HIV/AIDS and malaria. It is interesting to note that the type of hospital did not  
434 influence the identification of MNMs under the original WHO Disease-criterion. Again, this  
435 suggests that the WHO abstraction tool is more conservative in MNM identification.[13]  
436 Therefore, incorporating these expanded disease categories possibly expands the range of  
437 structural factors to consider, such as the type of hospital, when creating a potential MNM profile.

438 As expected, older age at delivery increased the odds of identifying MNMs in the  
439 Comorbidities criterion.[47,51-54] It is well-established that the risk of maternal morbidities is  
440 higher at two periods in a woman's reproductive life cycle.[26,53] The first is during adolescence  
441 (10 years -19 years) and the second is at the end of a woman's reproductive period (35 years and  
442 above).[53,55] One study shows that for women 10 to 15 years, their risk of maternal mortality is  
443 about five-fold higher than women between 20 to 24 years.[55] Another study presented that  
444 women older than 35 years were 74% more likely to develop a maternal near-miss than women  
445 between 25 and 34 years.[51] Women above 35 years especially run a higher risk of developing  
446 comorbid disease such as hypertension, heart and thyroid disease, and diabetes that complicate  
447 their pregnancies and make them more susceptible to MNMs.[51] This may also explain why the  
448 odds of identifying MNMs in women over 35 years was almost 5-fold within the Comorbidities  
449 group in our study as well. Although this socio-demographic factor did not show a significant  
450 association with MNMs identified by the other clinical criteria, it is important to realize that a

451 similar trend was seen with the odds of identifying MNMs defined by the original WHO Disease  
452 criterion. In summary, age may be an important factor to consider when building the MNM profile  
453 especially when relying on the Comorbidities definition within secondary hospitals across  
454 Inhambane.

455 Our study did not find any consistent associations between maternal education, marital status,  
456 profession or religion and MNMs defined by all clinical criteria. This is potentially because of the  
457 homogeneity of the study population in our sample. A majority of women had not completed  
458 formal schooling, were married, were unemployed, and declared their religion as Christian.  
459 Different groups of women with varying demographics should therefore be included in future  
460 studies.

461 This study has several strengths. To the best of our knowledge, it is one of the first studies  
462 that attempt to evaluate an adapted MNM evaluation tool, i.e. MCMH abstraction tool, and to  
463 refine the WHO clinical definition of MNMs based on local Mozambican clinical contexts. It also  
464 sheds more light on specific socio-demographic factors that help influence MNM identification in  
465 Inhambane. Moreover, the design of the MCMH abstraction tool – to include both the additional  
466 (Expanded Disease group) and original WHO Disease criterion – helps to better compare data and  
467 improve internal validity. This sharply contrasts with other studies where the WHO tool is  
468 completely separated and is different in design from the adapted versions, potentially causing  
469 inconsistencies in the data collection and results comparison process.[32-33,38,51] Again, this  
470 study worked directly with local clinicians who provided relevant clinical and cultural information  
471 to help contextualize the investigation. Another major strength was our considerable study sample  
472 which was comparable to the sample sizes present in the literature.

473           Nevertheless, some limitations must be acknowledged. For instance, we observed some data  
474 quality issues, such as participants receiving the same unique identifiers on separate hospital  
475 admissions. However, these errors were corrected during the data-cleaning phase. Also, the rigor  
476 of the study could have been further strengthened by introducing external control. Specifically, a  
477 clinician could have performed their clinical diagnoses of potential MNMs, independent of any  
478 abstraction criterion, as another source of comparison with both the WHO disease and additional  
479 clinical criteria. Another limitation is the homogeneity of the study population which potentially  
480 narrowed the ability to broadly generalize the findings beyond this circumscribed population.  
481 Despite these limitations, our study unveiled important findings concerning MNM identification  
482 in rural Mozambique settings. We hope that these findings can be applied to the current maternal  
483 health practices to improve obstetric care, especially within health facilities across the province of  
484 Inhambane.

485           To further advance the identification of MNMs using the MCMH model, future research is  
486 needed. For example, more investigation is required to determine if the MCMH abstraction tool  
487 produces similar results within different levels of care, such as primary and tertiary-level facilities.  
488 Although some socio-demographic factors were not statistically associated with MNMs in our  
489 study, further research should be done to test these associations within more diverse study  
490 populations. Furthermore, other socio-demographic factors based on the available literature that  
491 were not originally captured should also be tested. Finally, qualitative studies should be conducted  
492 to provide more insight that complement the findings of this present study.

493

494

## 495 **Conclusion**

496 This study demonstrated that using expanded clinical categories identified more potential  
497 MNM cases than using the WHO abstraction tool, especially the disease group as a criterion.  
498 Incorporating markers from an Expanded Disease-criterion, to identify MNMs strongly  
499 corroborated the identification of MNMs using the original WHO disease group. Conversely, using  
500 markers like HIV/AIDS within the Comorbidities criterion to identify MNMs consistently lacked  
501 corroboration with the original WHO clinical group, indicating less overlap between their  
502 populations. Therefore, relying on non-pregnancy-related comorbidities, i.e., HIV/AIDS, to profile  
503 women at greater risk for MNMs should be done cautiously. Geographical and socio-demographic  
504 factors such as longer distance to a health facility and older age of women increased the odds of  
505 identifying MNMs.

506 In summary, the study supports using the Expanded Disease-criterion alongside the original  
507 WHO disease category to identify a wider range of MNMs. It also emphasizes assessing specific  
508 socio-demographic factors, such as distance to the birth facility and age, to guide the identification  
509 of these cases.

## 510 **Acknowledgment**

511 The authors would like to thank members of the Mozambique Maternal Near-Miss Working  
512 Group (Stélio Tembe, Renata Munguambe, Jaciara Mussá, Assuçena Maíte, Lídia Mondlane,  
513 Milton Moçambique, Emilton Dgedge, David Arone, Joaquim Matshine, Fernanda Sumbana,  
514 Dorcia Mandlate) for helpful discussions surrounding the conceptualization and design of the  
515 study and the data collectors for their diligent work in collecting and maintaining quality data  
516 (Cidália Massunda, Egness Mbanguine, Lúcia Alar, Idércia Romão, Hermínia Fernando, Nércia  
517 Vilankulo, Sara Cossa, Angela Arnaldo, Dorca Muangue). The authors also acknowledge both

518 Inhambane Provincial and Vilankulo Rural hospitals and hospital supervisors (Raufa Mabunda,  
519 Victorino Candrinho, Cynthia Macaringue, Yolanda Messias, Fátima Nhamposse). for providing  
520 access to their patient population and hospital resources. Others in the MCMH project team also  
521 provided logistical and technical support throughout the duration of the study.

## 522 **Author Contributions**

523 **Conceptualization:** Nazeem Muhajarine, Maud Muosieyiri

524 **Data Curation:** Fernanda Andre, Maud Muosieyiri, Jessie Forsyth

525 **Investigation:** Maud Muosieyiri, Fernanda Andre

526 **Statistical Analysis:** Maud Muosieyiri, Nazeem Muhajarine

527 **Methodology:** Maud Muosieyiri, Nazeem Muhajarine

528 **Supervision:** Jessie Forsyth, Ana Paula Adoni, Nazeem Muhajarine

529 **Fund acquisition:** Nazeem Muhajarine

530 **Visualization:** Maud Muosieyiri

531 **Writing – original draft:** Maud Muosieyiri, Fernanda Andre, Nazeem Muhajarine

532 **Writing – review & editing:** Maud Muosieyiri, Fernanda Andre, Jessie Forsyth, Ana Paula  
533 Adoni, Nazeem Muhajarine

## 534 **Funding**

535 This work was supported by Global Affairs Canada (project number D-002085/P001061:  
536 Engaging Communities and Health Workers for Sexual, Reproductive, Maternal and Newborn  
537 Health; Principal Investigator: Nazeem Muhajarine) for the Mozambique-Canada Maternal Health  
538 Project, administered by the University of Saskatchewan. The funders had no role in study design,  
539 data collection and analysis, decision to publish, or preparation of the manuscript.

## 540 **Conflict of Interest**

541 The authors have declared no competing interests exist.

542



## 543 References

- 544 1. The 17 Goals | Sustainable Development [Internet]. Sdgs.un.org. 2022 [cited 3 March  
545 2022]. Available from: <https://sdgs.un.org/goals>
- 546 2. Sentora E. The Impact of the Safe Motherhood Initiative from 1987 to 2000. Embryo  
547 Project Encyclopedia. Arizona: Arizona State University School of Life Sciences; 2020.
- 548 3. Goalkeepers inspires the thinkers and doers [Internet]. Gatesfoundation.org. 2022 [cited 3  
549 March 2022] from: [https://www.gatesfoundation.org/goalkeepers/report/2021-  
550 report/progress-indicators/maternal-mortality/](https://www.gatesfoundation.org/goalkeepers/report/2021-report/progress-indicators/maternal-mortality/)
- 551 4. Chhabra P. Maternal near miss: An indicator for maternal health and maternal care.  
552 Indian Journal of Community Medicine. 2014;39(3):132.
- 553 5. Tunçalp Ö, Hindin M, Souza J, Chou D, Say L. The prevalence of maternal near miss: a  
554 systematic review. BJOG: An International Journal of Obstetrics & Gynaecology.  
555 2012;119(6):653-661.
- 556 6. Alemu FM, Fuchs M, Martin Vitale T, Abdalla Mohamed Salih M. severe maternal  
557 morbidity (near-miss) and its correlates in the world's newest nation: South sudan.  
558 International Journal of Women's Health. 2019;Volume 11:177–90.
- 559 7. Witteveen T, de Koning I, Bezstarosti H, van den Akker T, van Roosmalen J,  
560 Bloemenkamp K. Validating the WHO Maternal Near Miss Tool in a high-income  
561 country. Acta Obstetrica et Gynecologica Scandinavica. 2015;95(1):106-111.
- 562 8. Mantel G, Buchmann E, Rees H, Pattinson R. Severe acute maternal morbidity: a pilot  
563 study of a definition for a near-miss. BJOG: An International Journal of Obstetrics and  
564 Gynaecology. 1998;105(9):985-990.
- 565 9. Cecatti JG, Souza JP, Oliveira Neto AF, Parpinelli MA, Sousa MH, Say L, et al. Pre-  
566 validation of the who organ dysfunction based criteria for identification of maternal near  
567 miss. Reproductive Health. 2011 Aug 2;8(1). doi:10.1186/1742-4755-8-22.
- 568 10. Tura A, Trang T, van den Akker T, van Roosmalen J, Scherjon S, Zwart J et al.  
569 Applicability of the WHO maternal near miss tool in sub-Saharan Africa: a systematic  
570 review. BMC Pregnancy and Childbirth. 2019;19(1).
- 571 11. Liyew EF, Yalew AW, Afework MF, Essén B. Incidence and causes of maternal near-  
572 miss in selected hospitals of Addis Ababa, Ethiopia. Gurgel RQ, editor. PLOS ONE.  
573 2017 Jun 6;12(6):e0179013.
- 574 12. van den Akker T, Beltman J, Leyten J, Mwagomba B, Meguid T, Stekelenburg J, et al.  
575 The WHO Maternal Near Miss Approach: Consequences at Malawian District Level.  
576 Venter WDF, editor. PLoS ONE. 2013 Jan 25;8(1):e54805.
- 577 13. Tura A, Stekelenburg J, Scherjon S, Zwart J, van den Akker T, van Roosmalen J et al.  
578 Adaptation of the WHO maternal near miss tool for use in sub-Saharan Africa: an  
579 International Delphi study. BMC Pregnancy and Childbirth. 2017;17(1).
- 580 14. Javis K. An Exploration of a Culture of Reintegration with Women Who Have  
581 Experienced Obstetrical Fistula Repair in Northern Ghana, West Africa [PhD].  
582 University of Alberta; 2016.
- 583 15. Buor D. Determinants of utilisation of health services by women in rural and urban areas  
584 in Ghana. GeoJournal. 2004;61(1):89–102. doi:10.1007/s10708-005-1929-6

- 585 16. Sakai T, Sugawara Y, Watanabe I, Watanabe T, Tomata Y, Nakaya N, et al. Age at first  
586 birth and long-term mortality for mothers: The Ohsaki Cohort Study. *Environmental*  
587 *Health and Preventive Medicine*. 2017;22(1). doi:10.1186/s12199-017-0631-x
- 588 17. Nove A, Matthews Z, Neal S, Camacho AV. Maternal mortality in adolescents compared  
589 with women of other ages: Evidence from 144 countries. *The Lancet Global Health*. 2014  
590 Mar;2(3). doi:10.1016/s2214-109x(13)70179-7
- 591 18. Blanc AK, Winfrey W, Ross J. New findings for maternal mortality age patterns:  
592 Aggregated results for 38 countries. *PLoS ONE*. 2013;8(4).  
593 doi:10.1371/journal.pone.0059864
- 594 19. Godha D, Gage AJ, Hotchkiss DR, Cappa C. Predicting maternal health care use by age  
595 at marriage in multiple countries. *Journal of Adolescent Health*. 2016;58(5):504–11.  
596 doi:10.1016/j.jadohealth.2016.01.001
- 597 20. Solanke BL, Oladosu OA, Akinlo A, Olanisebe SO. Religion as a social determinant of  
598 maternal health care service utilisation in Nigeria. *African Population Studies*. 2015  
599 Dec;29(2). doi:10.11564/29-2-761
- 600 21. Gyimah S, Takyi B, Addai I. Challenges to the reproductive-health needs of African  
601 women: On religion and maternal health utilization in Ghana. *Social Science &*  
602 *Medicine*. 2006;62(12):2930-2944
- 603 22. Ayanore M, Pavlova M, Groot W. Unmet reproductive health needs among women in  
604 some West African countries: a systematic review of outcome measures and  
605 determinants. *Reproductive Health*. 2015;13(1).
- 606 23. Smith K, Sulzbach S. Community-based health insurance and access to maternal health  
607 services: Evidence from three West African countries. *Social Science & Medicine*.  
608 2008;66(12):2460-2473
- 609 24. Dotse-Gborgbortsi W, Nilsen K, Ofosu A, Matthews Z, Tejedor-Garavito N, Wright J, et  
610 al. Distance is “a big problem”: A geographic analysis of reported and modelled  
611 proximity to maternal health services in Ghana. *BMC Pregnancy and Childbirth*.  
612 2022;22(1). doi:10.1186/s12884-022-04998-0
- 613 25. Gage AJ. Barriers to the utilization of maternal health care in rural Mali. *Social Science*  
614 *& Medicine*. 2007;65(8):1666–82. doi:10.1016/j.socscimed.2007.06.001
- 615 26. Inhambane Province [Internet]. Wikimedia Foundation; 2023 [cited 2023 Aug 17].  
616 Available from: [https://en.wikipedia.org/wiki/Inhambane\\_Province](https://en.wikipedia.org/wiki/Inhambane_Province)
- 617 27. Cohen J. A coefficient of agreement for nominal scales. *Educational and Psychological*  
618 *Measurement*. 1960;20(1):37–46. doi:10.1177/001316446002000104
- 619 28. Hosmer DW, Lemeshow S. *Applied Logistic Regression*. 2nd ed. New York: John Wiley  
620 and Sons Inc ; 2000. (Wiley Series in probability and statistics).
- 621 29. Yemane Y, Tiruneh F. <p>incidence-proportion of maternal near-misses and associated  
622 factors in southwest Ethiopia: A prospective cross-sectional study</p>. *International*  
623 *Journal of Women’s Health*. 2020 Dec;Volume 12:1125–34. doi:10.2147/ijwh.s283122
- 624 30. Kiruja J, Osman F, Egal JA, Essén B, Klingberg-Allvin M, Erlandsson K. Maternal near-  
625 miss and death incidences – frequencies, causes and the referral chain in Somaliland: A  
626 pilot study using the WHO near-miss approach. *Sexual & Reproductive*  
627 *Healthcare*. 2017;12:30–6. doi:10.1016/j.srhc.2017.02.003

- 628 31. Bomela NJ. Maternal mortality by socio-demographic characteristics and cause of death  
629 in South Africa: 2007–2015. *BMC Public Health*. 2020;20(1). doi:10.1186/s12889-020-  
630 8179-x
- 631 32. Oladapo OT, Adetoro OO, Ekele BA, Chama C, Etuk SJ, Aboyeji AP, et al. When  
632 getting there is not enough: A nationwide cross-sectional study of 998 maternal deaths  
633 and 1451 near-misses in public tertiary hospitals in a low-income country. *Obstetric  
634 Anesthesia Digest*. 2017;37(1):19–20. doi:10.1097/01.aoa.0000512012.96214.08
- 635 33. Sayinzoga F, Bijlmakers L, van der Velden K, van Dillen J. Severe maternal outcomes  
636 and quality of care at district hospitals in Rwanda– a multicentre prospective case-control  
637 study. *BMC Pregnancy and Childbirth*. 2017;17(1). doi:10.1186/s12884-017-1581-4
- 638 34. Nakimuli A, Nakubulwa S, Kakaire O, Osinde MO, Mbalinda SN, Nabirye RC, et al.  
639 Maternal near misses from two referral hospitals in Uganda: A prospective cohort study  
640 on incidence, determinants and prognostic factors. *BMC Pregnancy and Childbirth*. 2016  
641 Jan 28;16(1). doi:10.1186/s12884-016-0811-5
- 642 35. Kalisa R, Rulisa S, van den Akker T, van Roosmalen J. Maternal near miss and quality of  
643 care in a rural Rwandan Hospital. *BMC Pregnancy and Childbirth*. 2016;16(1).  
644 doi:10.1186/s12884-016-1119-1
- 645 36. Menezes FE, Galvão LP, de Mendonça CM, Góis KA, Ribeiro RF, Santos VS, et al.  
646 Similarities and differences between who criteria and two other approaches for maternal  
647 near miss diagnosis. *Tropical Medicine & International Health*. 2015 Aug  
648 5;20(11):1501–6. doi:10.1111/tmi.12568
- 649 37. Kasahun AW, Wako WG. Predictors of maternal near miss among women admitted in  
650 gurgage zone hospitals, South Ethiopia, 2017: A case control study. *BMC Pregnancy and  
651 Childbirth*. 2018;18(1). doi:10.1186/s12884-018-1903-1
- 652 38. Nelissen EJ, Mduma E, Ersdal HL, Evjen-Olsen B, van Roosmalen JJ, Stekelenburg J.  
653 Maternal near miss and mortality in a rural referral hospital in northern Tanzania: A  
654 cross-sectional study. *BMC Pregnancy and Childbirth*. 2013;13(1). doi:10.1186/1471-  
655 2393-13-141
- 656 39. Mbachu II, Ezeama C, Osuagwu K, Umeononihu OS, Obiannika C, Ezeama N. A cross  
657 sectional study of maternal near miss and mortality at a rural tertiary centre in Southern  
658 Nigeria. *BMC Pregnancy and Childbirth*. 2017;17(1). doi:10.1186/s12884-017-1436-z
- 659 40. Rana HB, Banjara MR, Joshi MP, Kurth AE, Castillo TP. Assessing maternal and  
660 neonatal near-miss reviews in rural Nepal: An implementation research study to inform  
661 scale-up. *Acta Paediatrica*. 2018;107:17–23. doi:10.1111/apa.14300
- 662 41. Akrawi VS, Al-Hadithi TS, Al-Tawil NG. Major determinants of maternal near-miss and  
663 mortality at the maternity teaching hospital, Erbil City, Iraq. *Oman Medical Journal*.  
664 2017;32(5):386–95. doi:10.5001/omj.2017.74
- 665 42. Evensen A, Anderson JM, Fontaine P. Postpartum Hemorrhage: Prevention and  
666 Treatment. *American Family Physician*. 2017 Apr 1;95(7):442–9.
- 667 43. Benimana C, Small M, Rulisa S. Preventability of maternal near miss and mortality in  
668 Rwanda: A case series from the University Teaching Hospital of Kigali (chuk). *PLOS  
669 ONE*. 2018;13(6). doi:10.1371/journal.pone.0195711

- 670 44. Thaddeus S, Maine D. Too far to walk: Maternal mortality in context. *Social Science*  
671 & *Medicine*. 1994;38(8):1091–110. doi:10.1016/0277-9536(94)90226-7
- 672 45. Echoka E, Makokha A, Dubourg D, Kombe Y, Nyandieka L, Byskov J. Barriers to  
673 emergency obstetric care services: Accounts of survivors of life-threatening obstetric  
674 complications in Malindi District, Kenya. *Pan African Medical Journal*. 2014;17.  
675 doi:10.11604/pamjs.supp.2014.17.1.3042
- 676 46. Adeoye IA, Onayade AA, Fatusi AO. Incidence, determinants and perinatal outcomes of  
677 near miss maternal morbidity in Ile-Ife Nigeria: A prospective case control study. *BMC*  
678 *Pregnancy and Childbirth*. 2013 Apr 15;13(1). doi:10.1186/1471-2393-13-93
- 679 47. Danusa KT, Debelo BT, Wakgari N, Seifu B, Kenasa K, Daba G, et al. Predictors of  
680 maternal near miss in Public Hospitals of west shoa zone, central Ethiopia: A case-  
681 control study. *Frontiers in Medicine*. 2022;9. doi:10.3389/fmed.2022.868992
- 682 48. Dessalegn FN, Astawesegn FH, Hankalo NC. Factors associated with maternal near miss  
683 among women admitted in West Arsi Zone Public Hospitals, Ethiopia: Unmatched case-  
684 control study. *Journal of Pregnancy*. 2020;2020:1–10. doi:10.1155/2020/6029160
- 685 49. Assarag B, Dujardin B, Delamou A, Meski F-Z, De Brouwere V. Determinants of  
686 maternal near-miss in Morocco: Too late, too far, too sloppy? *PLOS ONE*. 2015;10(1).  
687 doi:10.1371/journal.pone.0116675
- 688 50. Hadush A, Dagnaw F, Getachew T, Bailey PE, Lawley R, Ruano AL. Triangulating data  
689 sources for further learning from and about the MDSR in Ethiopia: A cross-sectional  
690 review of facility based maternal death data from EMONC assessment and MDSR  
691 system. *BMC Pregnancy and Childbirth*. 2020;20(1). doi:10.1186/s12884-020-02899-8
- 692 51. Teshome HN, Ayele ET, Hailemeskel S, Yimer O, Mulu GB, Tadese M. Determinants of  
693 maternal near-miss among women admitted to public hospitals in North Shewa Zone,  
694 Ethiopia: A case-control study. *Frontiers in Public Health*. 2022;10.  
695 doi:10.3389/fpubh.2022.996885
- 696 52. Oliveira FC, Surita FG, Pinto e Silva JL, Cecatti JG, Parpinelli MA, Haddad SM, et al.  
697 Severe maternal morbidity and maternal near miss in the extremes of reproductive age:  
698 Results from a national cross-sectional multicenter study. *BMC Pregnancy and*  
699 *Childbirth*. 2014 Feb 20;14(1). doi:10.1186/1471-2393-14-77
- 700 53. Lisonkova S, Liu S, Bartholomew S, Liston RM, Joseph KS. Temporal trends in maternal  
701 mortality in Canada II: Estimates based on Hospitalization Data. *Journal of Obstetrics*  
702 *and Gynaecology Canada*. 2011;33(10):1020–30. doi:10.1016/s1701-2163(16)35051-4
- 703 54. Naderi T, Foroodnia S, Omidi S, Samadani F, Nakhaee N. Incidence and correlates of  
704 maternal near miss in Southeast Iran. *International Journal of Reproductive Medicine*.  
705 2015;2015:1–5. doi:10.1155/2015/914713
- 706 55. Conde-Agudelo A, Belizán JM, Lammers C. Maternal-perinatal morbidity and mortality  
707 associated with adolescent pregnancy in Latin America: Cross-sectional study. *American*  
708 *Journal of Obstetrics and Gynecology*. 2005;192(2):342–9.  
709 doi:10.1016/j.ajog.2004.10.593

710

711

## 712 **Supporting Information**

713 **S1 Fig.** WHO MNM Abstraction Tool (WHO MNM 1.1)

714 **S2 Fig.** Mozambique-Canada Maternal Health (MCMH) MNM Abstraction Tool

715 **S3 Table.** A Breakdown of Each Sub-Category Contribution to MNM Identification Stratified by  
716 Hospital (Inhambane Provincial Hospital and Vilankulo Rural Hospital)

717 **S4 Table.** Results From Chi-Square Test of Independence and Kappa Statistic Between the  
718 Original WHO Disease-Criterion vs the Mozambique Expanded Disease and Comorbidities  
719 Criteria in Inhambane Provincial Hospital

720 **S5 Table.** Results from Chi-Square Test of Independence and Kappa Statistic Between the  
721 Original WHO Disease-Criterion vs the Mozambique Expanded Disease and Comorbidities  
722 Criteria in Vilankulo Rural Hospital

723 **S6 Table.** Univariable Analysis on the Association Between Maternal Characteristics and the  
724 Original WHO Disease-Criterion MNMs

725 **S7 Table.** Univariable Analysis on the Association Between Maternal Characteristics and the  
726 Mozambique Expanded Disease-Criterion MNMs

727 **S8 Table.** Univariable Analysis on the Association Between Maternal Characteristics and the  
728 Mozambique Comorbidities Criterion MNMs

729 **S9 Table.** Univariable Analysis on the Association Between Socio-demographic Factors and the  
730 Mozambique Comorbidities Criterion MNMs in Inhambane Provincial Hospital

731 **S10 Table.** Multivariable Analysis on the Association Between Socio-demographic Factors and  
732 the Mozambique Comorbidities Criterion MNMs in Inhambane Provincial Hospital

733 **S11 Fig.** Odd Ratios of Sociodemographic factors on MNM-defined by Mozambique  
734 Comorbidities Criterion at Inhambane Provincial Hospital

735 **S12 Table.** Univariable Analysis on the Association Between Maternal Characteristics and  
736 Original WHO Disease-Criterion MNMs in Vilankulo Rural Hospital

737 **S13 Table.** Multivariable Analysis on the Association Between Maternal Characteristics and the  
738 Original WHO Disease- Criterion MNMs in Vilankulo Rural Hospital

739 **S14 Fig.** Odd Ratios of Sociodemographic Factors on MNMs Defined by The WHO Disease (A),  
740 Expanded Disease (B), and Comorbidities Criteria (C) in Vilankulo Rural Hospital

741 **S15 Table.** Univariable Analysis on the Association Between Maternal Characteristics and the  
742 Mozambique Expanded Disease Criterion MNMs in Vilankulo Rural Hospital

743 **S16 Table.** Multivariable Analysis on the Association Between Maternal Characteristics and the  
744 Mozambique Expanded Disease Criterion MNMs in Vilankulo Rural Hospital

745 **S17 Table.** Univariable Analysis on the Association Between Maternal Characteristics and the  
746 Mozambique Comorbidities Criterion MNMs in Vilankulo Rural Hospital

747 **S18 Table.** Multivariable Analysis on the Association Maternal Characteristics and the  
748 Mozambique Comorbidities Criterion MNMs in Vilankulo Rural Hospital

749

750

751

752

753

754

755

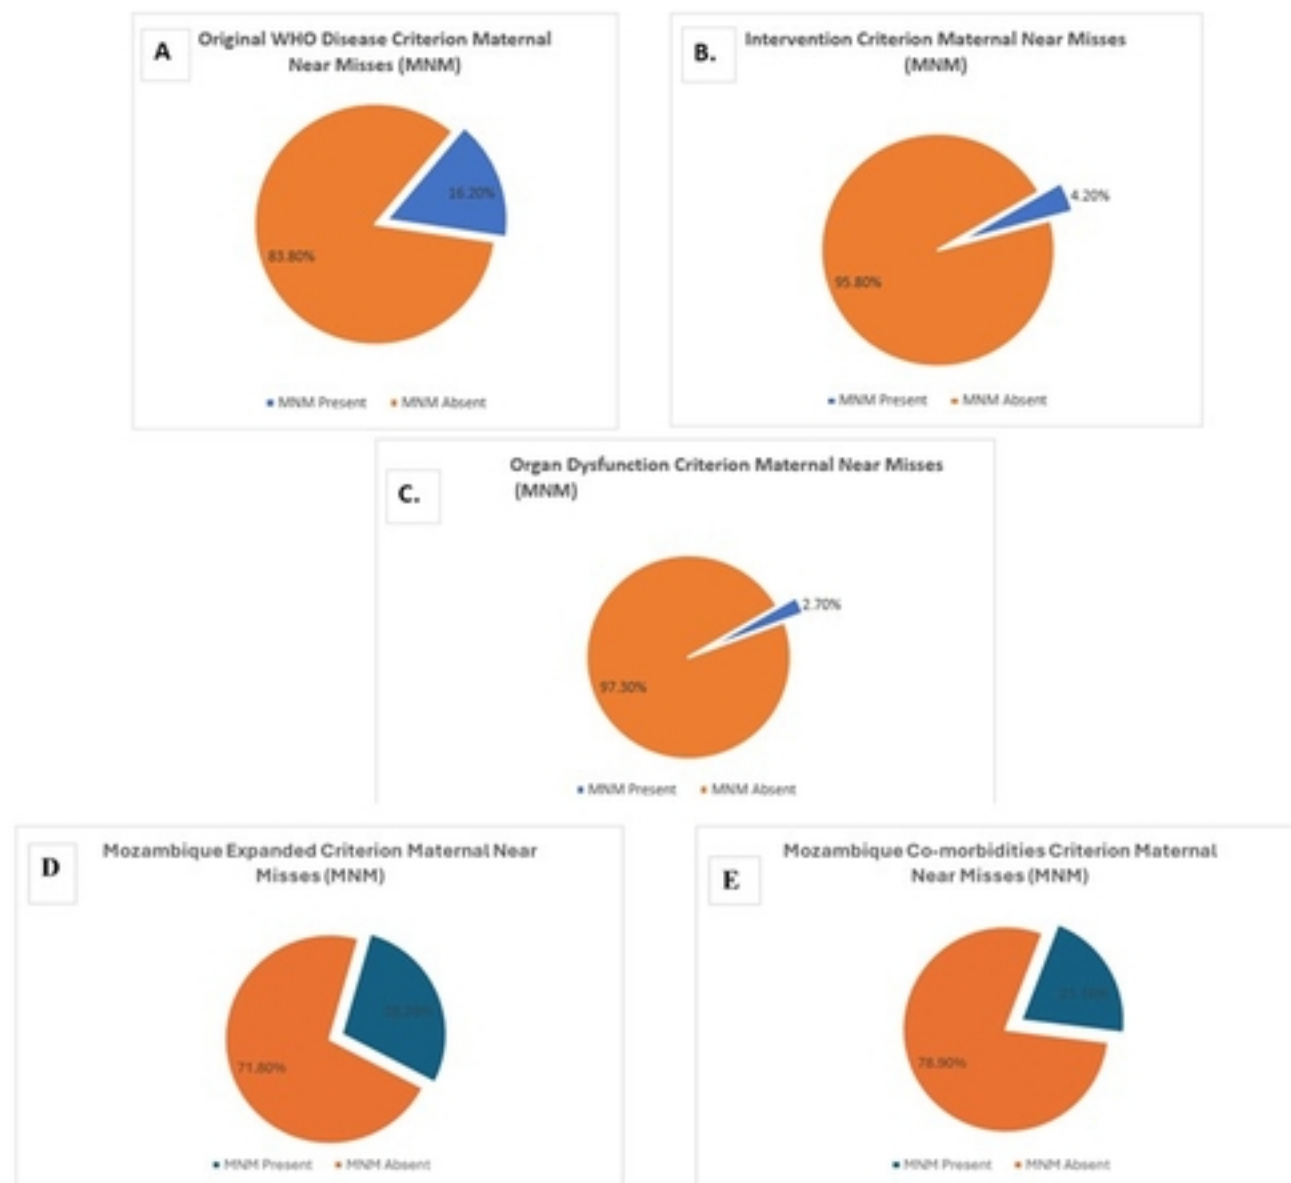

**Fig 1. Maternal Near-Misses Identified by the Different Criteria (Fig A – E) in the Mozambique-Canada Maternal Health Abstraction Tool**

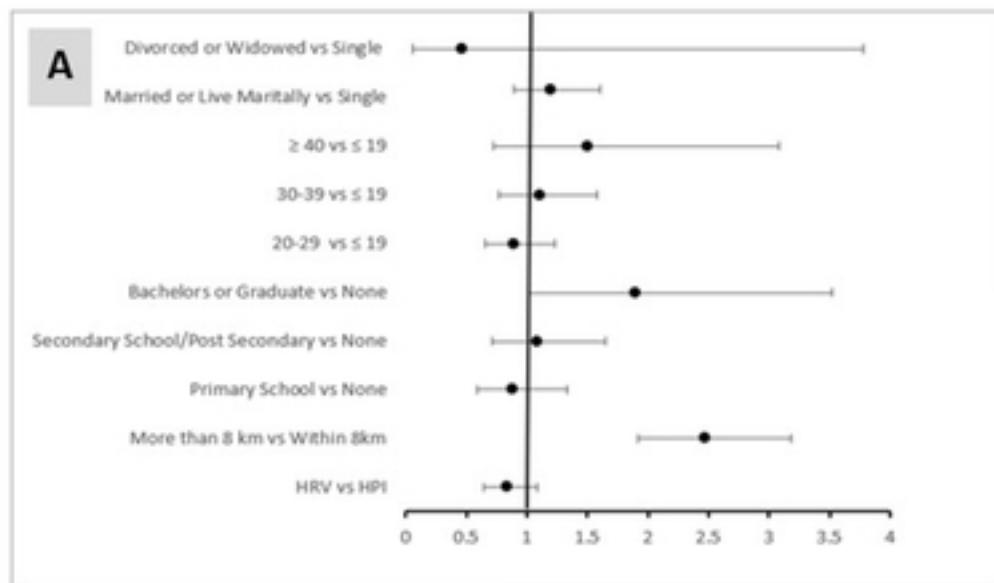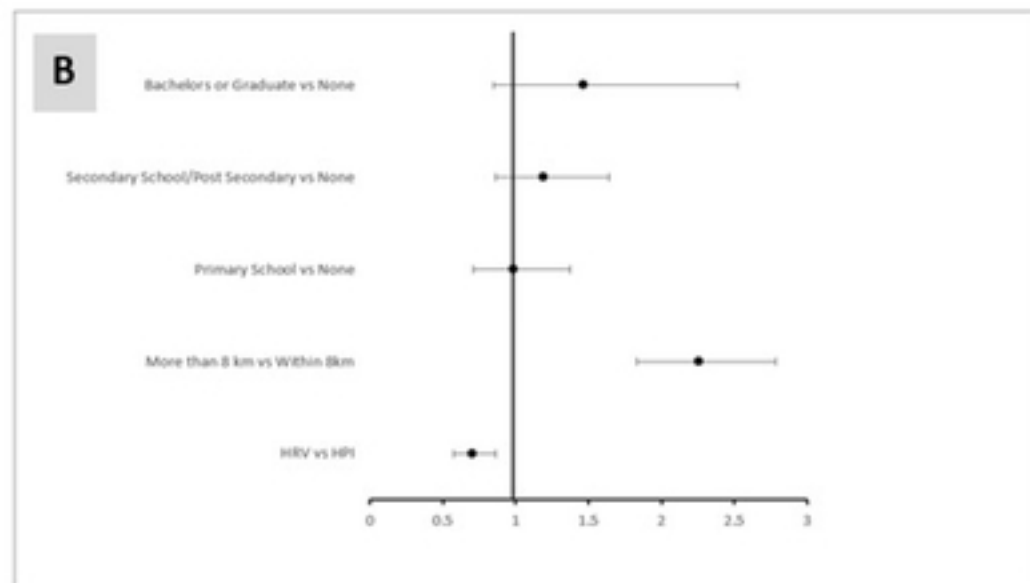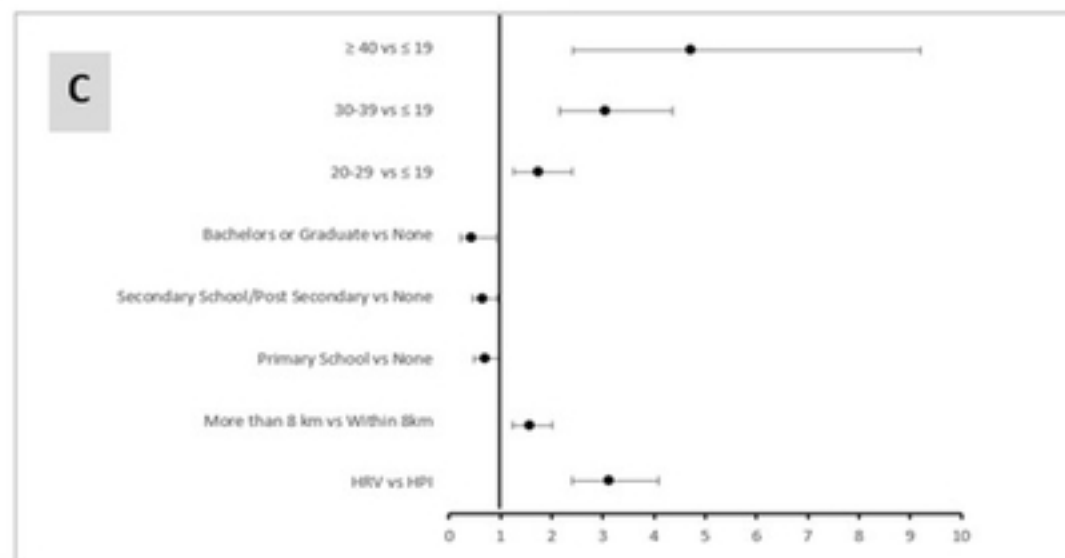

**Figure 2. Odds Ratios representing associations between sociodemographic factors and Maternal Near-Misses as defined by the WHO Disease criterion (A), MCMH expanded disease criterion (B), and MCMH co-morbidities criterion (C)**

Figure
